# Supplementary material for: Fruit Size and Structure of Zoochorous Trees: Identifying Drivers for the Foraging Preferences of Fruit-Eating Birds in a Mexican Successional Dry Forest
Source: MDPI journal article supplement (doi:10.3390/ani11123343), 2021-11-23
Supplement: s1 [file s1]

*Supplementary Materials*

# Fruit Size and Structure of Zoochorous Trees: Identifying Drivers for the Foraging Preferences of Fruit-Eating Birds in a Mexican Successional Dry Forest

R. Carlos Almazán-Núñez <sup>1,\*</sup>, Edson A. Alvarez-Alvarez <sup>1,2</sup>, Pablo Sierra-Morales <sup>1,2</sup> and Rosalba Rodríguez-Godínez <sup>1,2</sup>

<sup>1</sup> Laboratorio Integral de Fauna Silvestre (Área de Ornitología), Facultad de Ciencias Químico Biológicas, Universidad Autónoma de Guerrero, Chilpancingo 39090, Guerrero, Mexico; bio\_ed19@hotmail.com (E.A.A.-A.); sierra02pix@hotmail.com (P.S.-M.); goretti.merced3@gmail.com (R.R.-G.)

<sup>2</sup> Posgrado en Recursos Naturales y Ecología, Facultad de Ecología Marina, Universidad Autónoma de Guerrero, Acapulco 39390, Guerrero, Mexico

\* Correspondence: rcarlos.almazan@gmail.com; Tel.: +52-747-105-6697

**Citation:** Almazán-Núñez, R.C.; Alvarez-Alvarez, E.A.; Sierra-Morales, P.; Rodríguez-Godínez, R. Fruit Size and Structure of Zoochorous Trees: Identifying Drivers for the Foraging Preferences of Fruit-Eating Birds in a Mexican Successional Dry Forest. *Animals* **2021**, *11*, 3343. <https://doi.org/10.3390/ani11123343>

Academic Editors: Jesús Domínguez and Sandra Goded

Received: 18 September 2021

Accepted: 15 November 2021

Published: 23 November 2021

**Publisher's Note:** MDPI stays neutral with regard to jurisdictional claims in published maps and institutional affiliations.

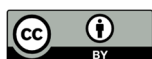

**Copyright:** © 2021 by the authors. Licensee MDPI, Basel, Switzerland. This article is an open access article distributed under the terms and conditions of the Creative Commons Attribution (CC BY) license (<http://creativecommons.org/licenses/by/4.0/>).

**Table S1.** Monthly fruiting phenology of zoochorous tree species in a TDF of southern Mexico. The space between the dotted lines corresponds to the rainy season of the year, while the rest of the space corresponds to the dry season. Months: January (Ja), February (Fe), March (Ma), April (Ap), May (My), June (Jn), July (Ju), August (Au), September (Se), October (Oc), November (No), December (De).

[illegible]

**Table S2.** Composition of fruit-eating birds along the successional gradient of TDF in southern Mexico. Type of frugivore: pulp consumer (PulC), seed predator (SeedP), legitimate disperser (LegD). Successional stage: early stage (ES), intermediate stage (IS), mature stage (MS). The nomenclature and systematic arrangement of bird species follow the guidelines of the American Ornithological Society [91].

| Family       | Bird species                     | English name               | Species code | Type of frugivore | Successional stages |    |    |
|--------------|----------------------------------|----------------------------|--------------|-------------------|---------------------|----|----|
|              |                                  |                            |              |                   | ES                  | IS | MS |
| Cracidae     | <i>Ortalis poliocephala</i>      | West Mexican Chachalaca    | Ortpol       | LegD              |                     | x  | x  |
| Momotidae    | <i>Momotus mexicanus</i>         | Russet-crowned Motmot      | Mommex       | LegD              |                     | x  |    |
| Picidae      | <i>Melanerpes chrysogenys</i>    | Golden-cheeked Woodpecker  | Melchr       | LegD              | x                   | x  |    |
|              | <i>Melanerpes hypopolius</i>     | Gray-breasted Woodpecker   | Melhyp       | LegD              |                     |    | x  |
| Psittacidae  | <i>Eupsittula canicularis</i>    | Orange-fronted Parakeet    | Eupcan       | SeedP             |                     | x  | x  |
|              | <i>Myiarchus tuberculifer</i>    | Dusky-capped Flycatcher    | Myitub       | LegD              |                     | x  | x  |
|              | <i>Myiarchus cinerascens</i>     | Ash-throated Flycatcher    | Myicin       | LegD              | x                   | x  | x  |
|              | <i>Myiarchus nuttingi</i>        | Nutting's Flycatcher       | Myinut       | LegD              |                     | x  |    |
| Tyrannidae   | <i>Myiarchus tyrannulus</i>      | Brown-crested Flycatcher   | Myityr       | LegD              | x                   | x  | x  |
|              | <i>Myiodynastes luteiventris</i> | Sulphur-bellied Flycatcher | Myilut       | LegD              | x                   |    | x  |
|              | <i>Tyrannus vociferans</i>       | Cassin's Kingbird          | Tyrvor       | LegD              |                     | x  | x  |
|              | <i>Tyrannus verticalis</i>       | Western Kingbird           | Tyrver       | LegD              | x                   | x  | x  |
|              | <i>Tyrannus forficatus</i>       | Scissor-tailed Flycatcher  | Tyrfor       | LegD              |                     |    | x  |
| Corvidae     | <i>Calocitta formosa</i>         | White-throated Magpie-Jay  | Calfor       | LegD              | x                   | x  |    |
| Fringillidae | <i>Haemorhous mexicanus</i>      | House Finch                | Haemex       | PulC              |                     | x  |    |
|              | <i>Spinus psaltria</i>           | Lesser Goldfinch           | Spipsa       | PulC              | x                   | x  | x  |
| Icteridae    | <i>Icterus wagleri</i>           | Black-vented Oriole        | Ictwag       | LegD              |                     | x  | x  |
|              | <i>Icterus pustulatus</i>        | Streak-backed Oriole       | Ictpus       | LegD              | x                   | x  |    |
|              | <i>Piranga ludoviciana</i>       | Western Tanager            | Pirlud       | LegD              |                     | x  | x  |
|              | <i>Pheucticus melanocephalus</i> | Black-headed Grosbeak      | Phemel       | SeedP             |                     |    | x  |
| Cardinalidae | <i>Passerina caerulea</i>        | Blue Grosbeak              | Paecae       | SeedP             |                     | x  | x  |
|              | <i>Passerina leclancherii</i>    | Orange-breasted Bunting    | Paslec       | PulC              |                     |    | x  |
|              | <i>Passerina versicolor</i>      | Varied Bunting             | Pasver       | PulC              | x                   | x  | x  |

**Table S3.** Foraging preferences based on the coverage of zoochorous trees by group of frugivore and by species of bird for each of the successional stages. Significant preferences (+) or avoidances (-) are shown with:  $\pm p < 0.05$ ,  $\pm \pm p < 0.01$ ,  $\pm \pm \pm p < 0.001$ . Type of frugivore: pulp consumer (PulC), seed predator (SeedP), legitimate disperser (LegD). The complete names of the zoochorous tree species and fruit-eating bird species are shown in Table S1 and S2, respectively.

| Bird species  | Early |     |     |     |     | Intermediate |     |     |     |     |     |     |     |     |     | Mature |     |     |     |     |     |     |     |     |     |
|---------------|-------|-----|-----|-----|-----|--------------|-----|-----|-----|-----|-----|-----|-----|-----|-----|--------|-----|-----|-----|-----|-----|-----|-----|-----|-----|
|               | Bap   | Bfa | Bmo | Bsc | Sca | Bap          | Bch | Bfa | Blo | Bmo | Bsc | Bsu | Bsn | Bve | Csp | Bap    | Bch | Bfa | Blo | Bmo | Bsc | Bsu | Bsn | Bve | Bxo |
| <i>Pasver</i> |       |     | +++ |     |     |              |     |     |     |     | +++ |     |     |     |     |        |     | ++  |     |     | +++ |     |     |     |     |
| <i>Paslec</i> |       |     |     |     |     |              |     |     |     |     |     |     |     |     |     |        |     |     | +   |     | +++ |     |     |     |     |
| <i>Haemex</i> |       |     |     |     |     | ++           |     |     | ++  |     |     |     |     |     |     |        |     |     |     |     |     |     |     |     |     |
| <i>Spipsa</i> |       |     |     |     |     |              |     |     | +   | ++  |     |     |     |     |     |        |     |     | +++ |     |     |     |     |     |     |
| <i>PulC</i>   |       |     |     |     |     |              |     |     | +++ |     | ++  | -   |     | --  |     | -      |     | +++ | -   | ++  |     |     |     |     | -   |
| <i>Eupcan</i> |       |     |     |     |     |              |     |     | ++  |     |     |     |     | ++  |     |        |     | +++ |     |     |     |     |     |     | +   |
| <i>Pascae</i> |       |     |     |     |     |              |     |     | +++ |     |     |     |     |     |     |        |     |     |     | +++ | ++  |     |     |     |     |
| <i>Phemel</i> |       |     |     |     |     |              |     |     |     |     |     |     |     |     |     |        |     |     |     |     |     |     |     |     |     |
| <i>SeedP</i>  |       |     |     |     |     |              |     |     | +++ | -   |     |     |     | +   |     | -      |     | +++ |     |     |     | +   |     |     |     |
| <i>Ortpol</i> |       |     |     |     |     |              |     |     |     |     | +   |     |     |     |     |        |     |     |     |     |     |     |     |     |     |
| <i>Melchr</i> |       |     |     |     | +++ |              |     |     |     | ++  |     | ++  |     |     | +++ |        |     |     |     |     |     |     |     |     |     |
| <i>Melhyp</i> |       |     |     |     |     |              |     |     |     |     |     |     |     |     |     |        |     |     |     | +++ |     |     |     |     |     |
| <i>Myicin</i> | +     | +   |     |     |     | +++          |     | ++  |     |     |     |     |     | -   |     |        |     | +++ | -   |     |     |     |     |     | --  |
| <i>Myitub</i> |       |     |     |     |     |              |     | +++ |     |     |     |     |     |     |     |        |     | ++  |     |     |     |     |     |     |     |
| <i>Myityr</i> |       |     |     |     |     |              |     |     |     |     |     |     |     |     |     | ++     |     |     |     |     |     |     |     |     |     |
| <i>Myinut</i> |       |     |     |     |     |              |     |     | +   | +   |     |     |     |     |     |        |     |     |     |     |     |     |     |     |     |
| <i>Myilut</i> |       |     |     | +++ |     |              |     |     |     |     |     |     |     |     |     |        |     |     |     | +++ |     |     |     |     |     |
| <i>Tyrver</i> |       |     |     |     |     |              |     |     |     |     |     | +++ |     | --- |     |        |     | -   | +++ | ++  | -   |     |     |     | --- |
| <i>Tyrvoc</i> |       |     |     |     |     |              |     | ++  |     | +++ |     |     |     |     |     |        |     | +++ |     |     |     | -   |     |     | --  |
| <i>Tyrfor</i> |       |     |     |     |     |              |     |     |     |     |     |     |     |     |     |        |     |     |     |     |     | +++ |     |     |     |
| <i>Calfor</i> |       |     |     | +++ |     |              |     | +++ |     |     |     |     |     |     |     |        |     |     |     |     |     |     |     |     |     |
| <i>Pirlud</i> |       |     |     |     |     |              |     |     |     |     |     |     |     | +++ |     |        |     |     |     | +++ |     |     |     |     |     |
| <i>Ictwag</i> |       |     |     |     |     |              |     |     |     | +++ |     |     |     |     |     |        |     |     | +++ |     |     |     |     |     |     |
| <i>Ictpus</i> |       |     |     | ++  |     |              |     |     |     |     | +++ |     |     | -   |     |        |     |     |     |     |     |     |     |     |     |
| <i>Mommex</i> |       |     |     |     |     |              |     |     |     |     |     |     |     |     |     |        |     |     |     |     |     |     |     |     |     |
| <i>LegD</i>   |       |     |     | +   | --  |              | -   | +++ | +   |     |     |     | --- | --- |     |        | -   | --- | +++ |     |     |     | -   | --- | --  |

**Table S4.** Foraging preferences based on the foliage height diversity of zoochorous trees by group of frugivore and by species of bird for each of the successional stages. Significant preferences (+) or avoidances (-) are shown with:  $\pm p < 0.05$ ,  $\pm \pm p < 0.01$ ,  $\pm \pm \pm p < 0.001$ . Type of frugivore: pulp consumer (PulC), seed predator (SeedP), legitimate disperser (LegD). The complete names of the zoochorous tree species and fruit-eating bird species are shown in Table S1 and S2, respectively.

| Bird species   | Early |     |     | Intermediate |     |     |     |     |     |     |     |     |     |     | Mature |     |     |     |     |     |     |     |     |     |     |
|----------------|-------|-----|-----|--------------|-----|-----|-----|-----|-----|-----|-----|-----|-----|-----|--------|-----|-----|-----|-----|-----|-----|-----|-----|-----|-----|
|                | Blo   | Bmo | Sca | Bap          | Bch | Bfa | Bgr | Blo | Bmo | Bsc | Bsu | Bsn | Bxo | Bve | Csp    | Bap | Bch | Bfa | Blo | Bmo | Bsc | Bsn | Bsu | Bve | Bxo |
| <i>Pasver</i>  |       | +++ |     |              |     |     |     | ++  |     | +++ |     |     |     |     |        |     |     | +   |     |     | +++ |     |     |     |     |
| <i>Paslec</i>  |       |     |     |              |     |     |     |     |     |     |     |     |     |     |        |     |     |     | +++ |     |     |     |     |     |     |
| <i>Haemex</i>  | +++   |     |     | ++           |     |     |     | +   |     |     |     |     |     |     |        |     |     |     |     |     |     |     |     |     |     |
| <i>Spipsa</i>  | +++   |     |     |              |     |     |     | +   | +++ |     |     |     |     |     |        |     |     |     | +++ |     |     |     |     |     |     |
| <i>PulC</i>    | +++   |     |     |              |     |     |     | +++ |     |     |     |     |     | -   |        |     |     |     | +++ |     |     |     |     |     |     |
| <i>Eupcan</i>  |       |     |     |              |     |     |     | +++ |     |     |     |     |     | +++ |        |     |     |     | +++ |     |     |     |     |     |     |
| <i>Pascae</i>  |       |     |     |              |     |     |     |     |     |     |     |     |     |     |        |     |     |     |     | +++ |     |     |     |     |     |
| <i>Phemel</i>  |       |     |     |              |     |     |     |     |     |     |     |     |     |     |        |     |     |     | ++  |     |     |     |     | ++  |     |
| <i>SeedP</i>   |       |     |     |              |     |     |     | +++ |     |     |     |     |     | +++ |        | -   |     |     | +++ |     |     |     |     |     |     |
| <i>Ortpol</i>  |       |     |     |              |     |     |     | +++ |     |     |     |     |     |     |        |     |     |     |     |     |     |     |     |     |     |
| <i>Melchr</i>  |       |     | +++ |              |     |     |     |     | +++ |     | ++  |     |     |     | +++    | ++  |     |     | ++  |     |     |     |     |     |     |
| <i>Melhyp</i>  |       |     |     |              |     |     |     |     |     |     |     |     |     |     |        |     |     |     | +++ |     |     |     |     |     |     |
| <i>Myicin</i>  |       |     | +   |              |     |     |     | +++ |     |     |     |     |     | -   |        | +   |     | +++ | -   |     |     |     |     | -   |     |
| <i>Myitub</i>  |       |     |     |              |     |     |     | +++ |     |     |     |     |     |     |        |     |     |     | +++ |     |     |     |     |     |     |
| <i>Myityr</i>  | +++   |     |     |              |     |     |     | +++ | ++  |     |     |     |     |     |        | +++ | -   |     | +++ |     |     | -   |     |     |     |
| <i>Myinut</i>  |       |     |     |              |     |     |     | +++ | ++  |     |     |     |     |     |        |     |     |     |     |     |     |     |     |     |     |
| <i>Myilut</i>  | ++    | -   |     |              |     |     |     |     |     |     |     |     |     |     |        |     |     |     | +++ |     |     |     |     |     |     |
| <i>Tyrover</i> | +++   |     |     |              |     | -   | -   | +++ |     | -   |     | -   |     | --  |        |     | -   | -   | +++ | +++ | --  | -   | +   | --  | --  |
| <i>Tyrvoc</i>  |       |     |     | -            |     |     |     | +++ |     | +++ |     |     |     |     |        |     | -   |     | +++ |     |     | -   | -   | -   | -   |
| <i>Tyrfor</i>  |       |     |     |              |     |     |     |     |     |     |     |     |     |     |        |     |     |     |     |     |     | +++ |     |     |     |
| <i>Calfor</i>  |       |     | +++ |              |     |     |     | +++ |     |     |     |     |     |     |        |     |     |     |     |     |     |     |     |     |     |
| <i>Pirlud</i>  |       |     |     |              |     |     |     | +++ |     |     |     |     |     |     |        |     |     |     |     | +++ |     |     |     |     |     |
| <i>Ictwag</i>  | +++   |     |     |              |     |     |     |     | +++ |     |     |     |     |     |        |     |     |     | +++ |     |     |     |     |     |     |
| <i>Ictpus</i>  | ++    |     |     |              |     |     |     | +++ |     |     |     |     |     |     |        | ++  |     |     | +++ | +   | -   |     |     |     |     |
| <i>Mommex</i>  |       |     |     |              |     |     |     | ++  |     |     |     |     |     |     |        |     |     |     |     |     |     |     |     |     |     |
| <i>LegD</i>    | +++   | +   |     | -            | ++  | --  | --  | +++ | +++ |     |     | --  | -   | --  |        | +++ | --  | --  | +++ | +++ | --  | --  |     | --  | --  |
